# Supplementary material for: Detection of Salmonella Typhi in Bile by Quantitative Real-Time PCR
Source: PubMed Central journal article supplement (PMC9241738; doi:10.1128/spectrum.00249-22), 2022-05-31
Supplement: spectrum.00249-22-s0001.pdf [file spectrum.00249-22-s0001.pdf]

**Supplementary table.** Optimization of bile processing conditions.

| Volume of bile | Spiked with <i>S. Typhi</i> Ty2 CFU | No. of washes of bile prior to DNA extraction | Average Cq for designated probesets and volume of template |                 |                     |           |           |           | Pass/Fail |
|----------------|-------------------------------------|-----------------------------------------------|------------------------------------------------------------|-----------------|---------------------|-----------|-----------|-----------|-----------|
|                |                                     |                                               | oriC                                                       |                 |                     | STY0201   |           |           |           |
|                |                                     |                                               | 2 $\mu$ l                                                  | 4 $\mu$ l       | 6 $\mu$ l           | 2 $\mu$ l | 4 $\mu$ l | 6 $\mu$ l |           |
| 200 $\mu$ l    | 10 <sup>4</sup>                     | 1X                                            | 35.37                                                      | NT <sup>a</sup> | Undet. <sup>b</sup> | Undet.    | NT        | Undet.    | Fail      |
| 400 $\mu$ l    | 10 <sup>4</sup>                     | 1X                                            | 31.41                                                      | 31.73           | 32.27               | 32.02     | 32.25     | 36.20     | Pass      |
|                | 10 <sup>3</sup>                     | 1X                                            | 29.14                                                      | NT              | 29.21               | 30.42     | NT        | 31.14     | Pass      |
| 500 $\mu$ l    | 10 <sup>3</sup>                     | 2X                                            | 28.08                                                      | NT              | 27.92               | 29.17     | NT        | 28.99     | Pass      |
|                | 10 <sup>4</sup>                     | 1X                                            | 31.26                                                      | Undet.          | Undet.              | 32.01     | 34.76     | Undet.    | Fail      |
| 1 ml           | 10 <sup>4</sup>                     | 3X                                            | 36.39                                                      | 37.41           | Undet.              | 36.39     | 37.01     | Undet.    | Fail      |

<sup>a</sup>, Not tested

<sup>b</sup>, Cq undetermined
